# Supplementary material
Source: PubMed Central journal article supplement (PMC3547527)

## **SUPPLEMENTARY FIGURE CAPTIONS**

**Figure S1:** Deconvoluted tandem MS data of two kappa casein glycopeptide isomers corresponding in mass to  $[\text{STVAT}+\text{GalNAc}_1+\text{Gal}_1+\text{NeuAc}_1+2\text{H}]^{+2}$  (**A**) eluting at 19.5 min with the NeuAc residue connected to the Gal residue and (**B**) eluting at 22.0 min with the NeuAc residue connected to the GalNAc residue. Rectangles (  ), circles (  ) and diamond symbols (  ) represent GalNAc, Gal and NeuAc residues, respectively.

**Figure S2:** Deconvoluted tandem MS data of two ribonuclease B glycopeptides corresponding in mass to the glycopeptides (**A**)  $[\text{NLTK}+\text{GlcNAc}_2+\text{Man}_5+2\text{H}]^{+2}$  and (**B**)  $[\text{NLTK}+\text{GlcNAc}_2+\text{Man}_9+2\text{H}]^{+2}$ . Circles (  ) and squares (  ) represent mannose and GlcNAc residues, respectively.

**Figure S3:** Extracted compound chromatograms (ECCs) of ribonuclease B glycopeptides generated following pronase digestion of (**A**) 1  $\mu\text{g}$  of the protein and (**B**) 100 ng of the protein.

**Figure S4:** Extracted compound chromatogram (ECC) of ribonuclease B glycopeptides generated following subtilisin digestion of 10  $\mu\text{g}$  of the protein.

**Figure S5:** Deconvoluted tandem MS data of two bovine lactoferrin glycopeptides corresponding in mass to the glycopeptides (**A**)  $[\text{NDT}+\text{GlcNAc}_2+\text{Man}_8+2\text{H}]^{+2}$  and (**B**)  $[\text{NDT}+\text{GlcNAc}_2+\text{Man}_9+2\text{H}]^{+2}$ . Circles (  ) and squares (  ) represent mannose and GlcNAc residues, respectively.

**Figure S6:** Detailed site-heterogeneity and detected glycoform abundance of human immunoglobulin M obtained via INPEG analysis on human serum.

Figure S1A and S1B

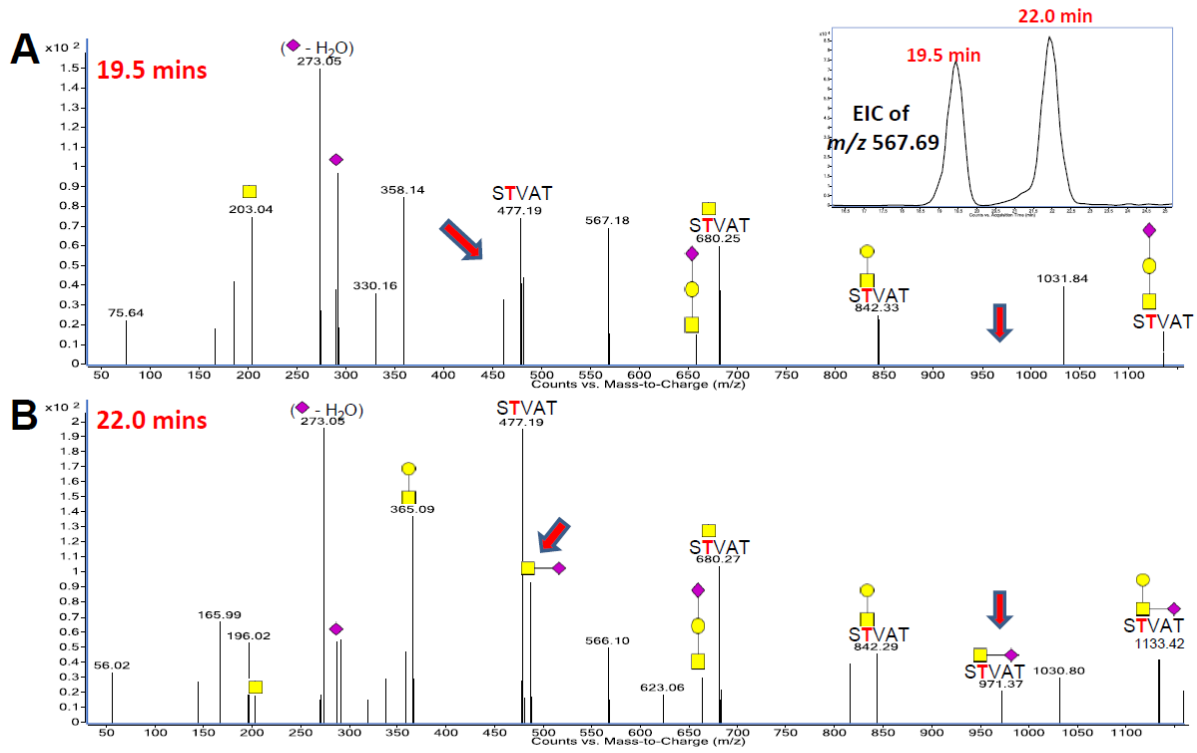

Figure S2A and S2B

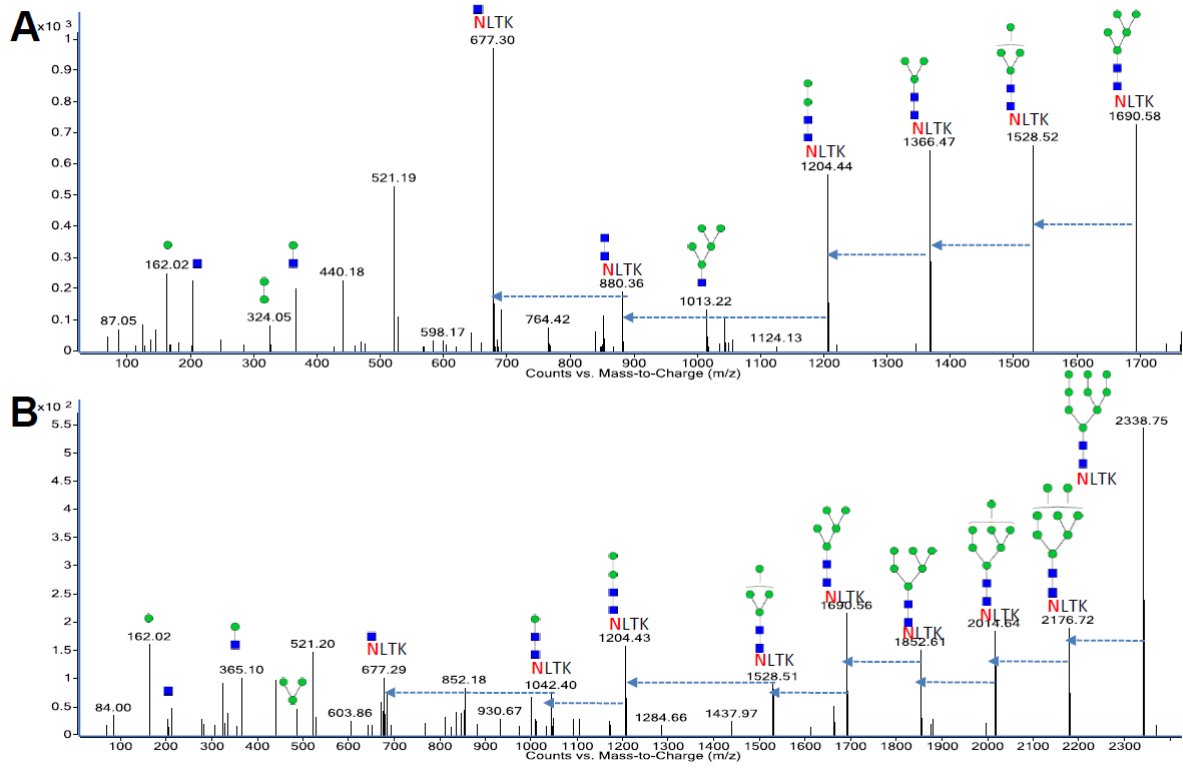

Figure S3A and S3B

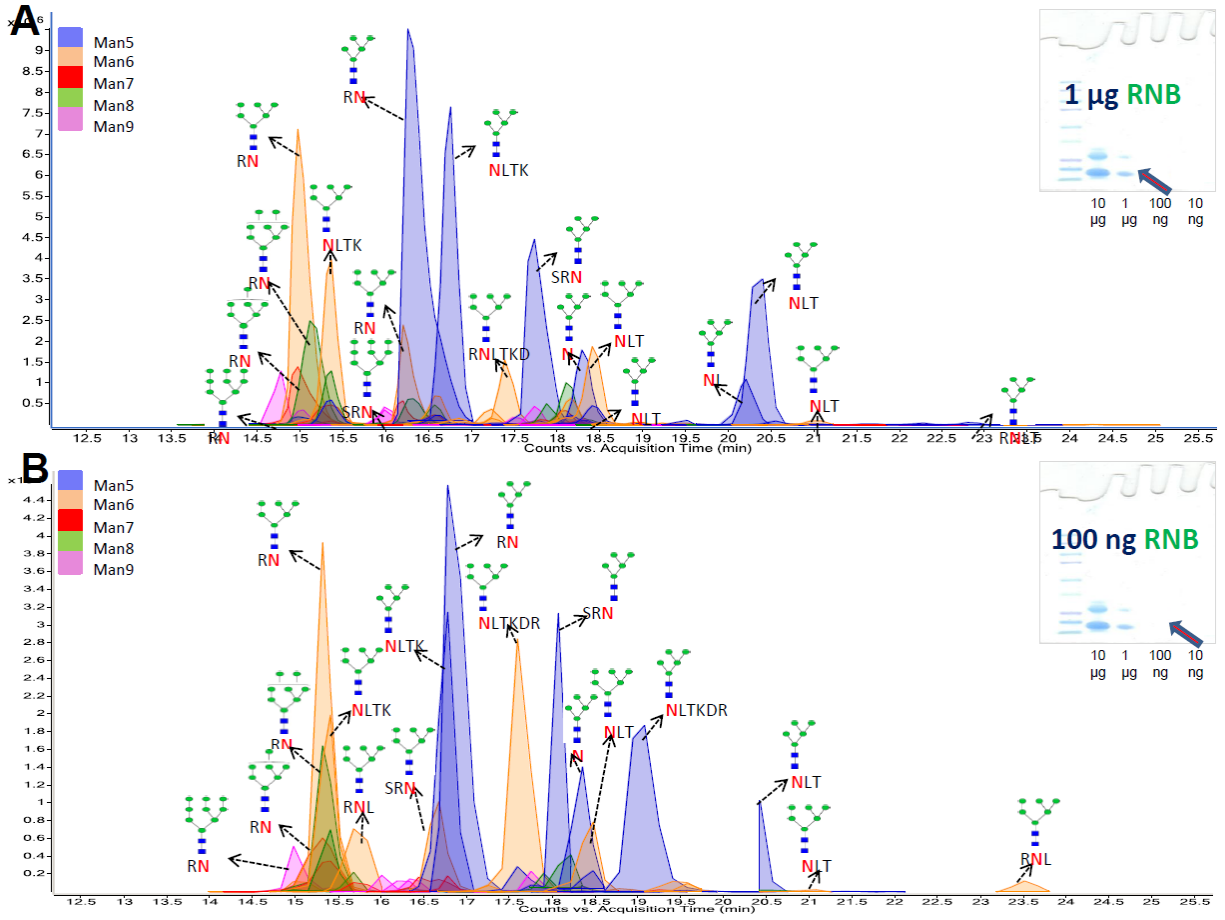

Figure S4

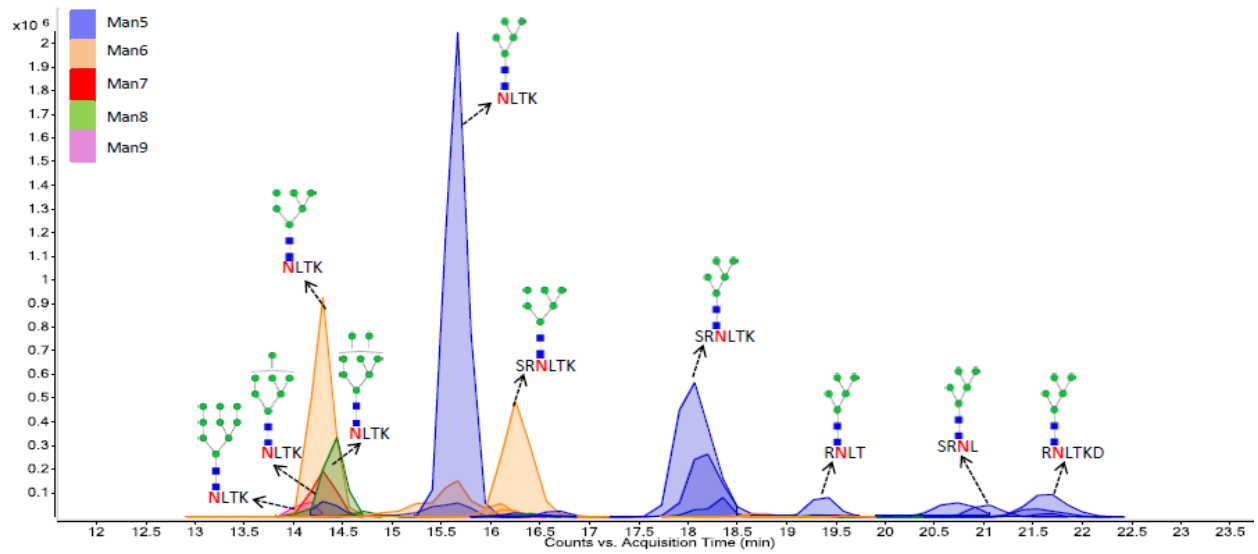

Figure S5A and S5B

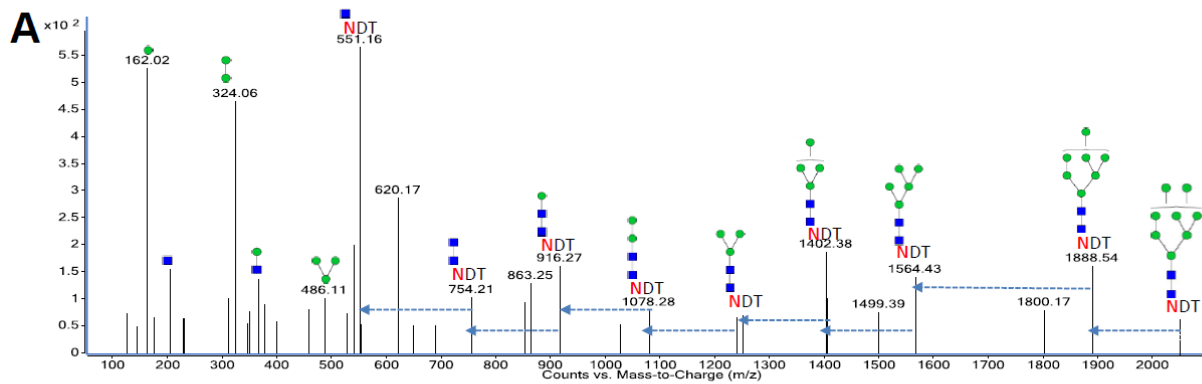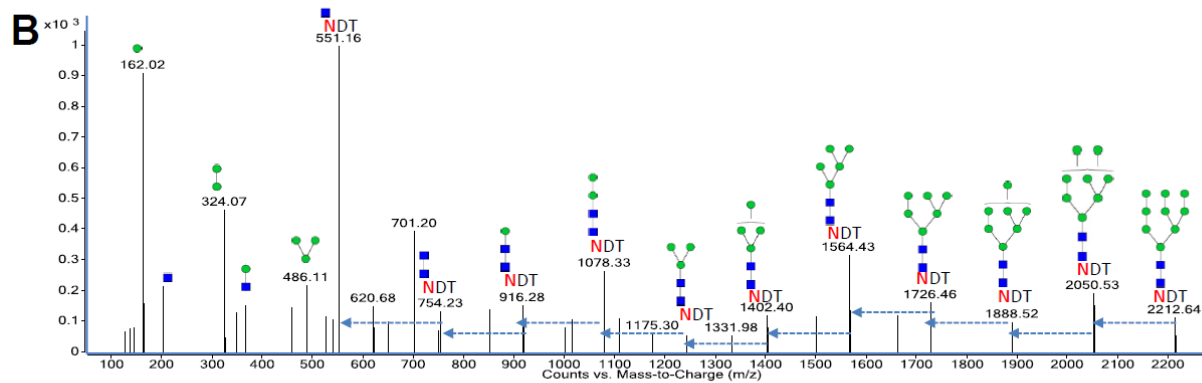

Figure S6

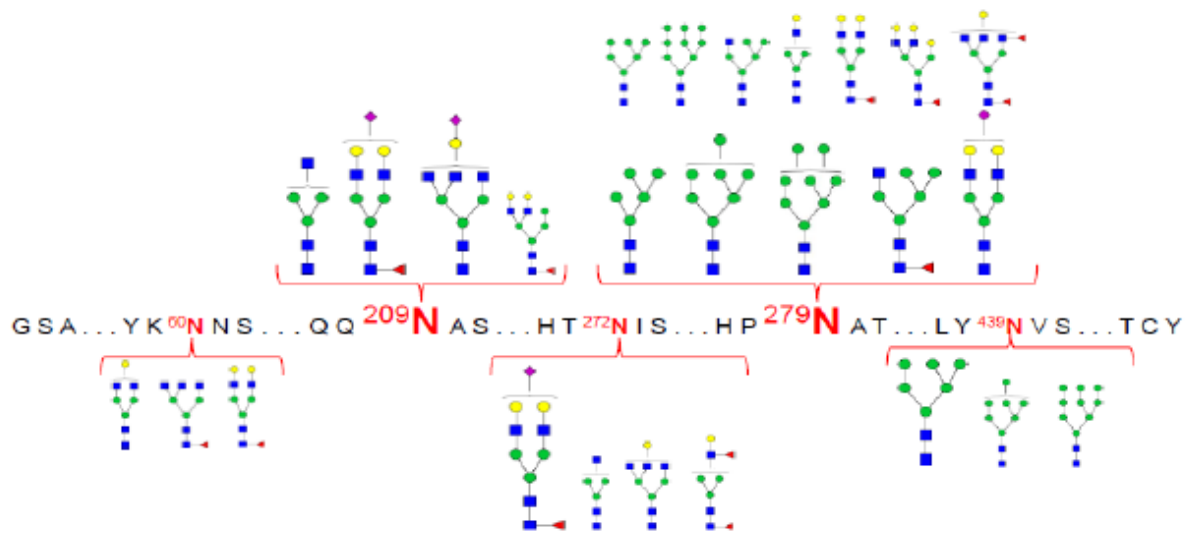

Supplement: NIHMS432179-supplement-1_si_001.pdf [file NIHMS432179-supplement-1_si_001.pdf]
